# Supplementary material
Source: HighWire-hosted journal article supplement (doi:10.1101/rna.076133.120)
Supplement: Supplemental_Information.docx [file Supplemental_Information.docx]

**Supplemental Information**

**3'READS+RIP defines differential Staufen1 binding to alternative 3'UTR isoforms and reveals structures and sequence motifs influencing binding and polysome association**

**Zheng, Cho, Wang et al.**

**Supplemental Tables**

**TABLE S1. Sequencing data statistics**

| **Sample** | **Description** | **No. of raw read** | **No. of mapped reads** | **PAS reads** |
| --- | --- | --- | --- | --- |
| GFP_IP_1 | FLAG-GFP IP replicate 1 | 24,469,925 | 2,039,998 | 1,291,888 |
| GFP_IP_2 | FLAG-GFP IP replicate 2 | 24,740,044 | 2,079,711 | 1,245,270 |
| STAU1_IP_1 | STAU1-FLAG IP replicate 1 | 13,315,774 | 9,466,462 | 6,212,606 |
| STAU1_IP_2 | STAU1-FLAG IP replicate 2 | 17,529,908 | 9,439,905 | 5,727,812 |
| GFP_Input_1 | FLAG-GFP input replicate 1 | 13,649,754 | 10,052,552 | 7,636,541 |
| GFP_Input_2 | FLAG-GFP input replicate 2 | 15,918,098 | 11,840,312 | 8,932,299 |
| STAU1_Input_1 | STAU1-FLAG input replicate 1 | 15,888,310 | 7,551,472 | 5,567,893 |
| STAU1_Input_2 | STAU-FLAG input replicate 2 | 18,084,611 | 12,915,042 | 9,655,646 |
| KO_C | *STAU1-*KO cytoplasm | 8,107,877 | 5,535,938 | 3,232,580 |
| KO_P | *STAU1-*KO polysome | 7,318,471 | 5,213,525 | 3,483,937 |
| WT_C | WT cytoplasm | 7,168,472 | 4,710,771 | 2,904,902 |
| WT_P | WT polysome | 6,415,605 | 4,487,678 | 2,799,226 |

Raw, raw reads; Mapped, reads uniquely mapped to the genome; PASS, reads supporting PAS.

**TABLE S2. RT-qPCR primers**

| **Total-cell mRNA** | **Sense primer** | **Antisense primer** |
| --- | --- | --- |
| NICN1 | ACTTCATCTGCAAGGTCACTTAC | ACAGTAGTCTGTCCTCATGTGG | |
| **aUTR mRNA isoform** | **Sense primer** | **Antisense primer** | |
| *PYCR3* | CCCTTCATCTGCTCTCTCTTAC | ACCAAGCAGTCAACTGAGTC | |
| *PCYT2* | AGGGAGAACCTACCCATCT | GGGCAAGGAGGAGAGTTG | |
| *ZER1* | ATTGCTTCTCATCGGACACTT | AGCCATCACCCAAAGGC | |
| *HEMK1* | GTAGGCTGTCATCAGAACAAAGG | CTGTCCCGCAGAGGTTAAAG | |
| *DCAF11* | GTGCCTGTAATCTCAGCTACTTG | GGCATGGTCTTGGCTCACTG | |
| *TLE3* | CCACTGTTGCTGTCACATTCTG | CGACACAGTATGGGATTGTGAAATC | |
| *C11orf58* | GCCTGACCAACATGGAGAAA | CCTCCTGAGTAGCTGGGATTA | |
| *SPRYD7* | TCCAAGTCTCAGATTCCCATTTAT | GCAAGTGCCTATGATTATTAAGGTG | |
| *SSR3* | AAGTTTGGGAAGCTCTTTAGC | GGTGCTGCTTGTAGGAAATTA | |
| **cUTR mRNA**  **isoform** | **Sense primer** | **Antisense primer** | |
| *PYCR3* | CCCAGTGAGCAGAAGGCAC | GTCTCGTGGGCTCGGA | |
| *PCYT2* | GGAAATCTCTTTGGTACAACCGAATAAAG | GTCTCGTGGGCTCGGA | |
| *ZER1* | GGACTTTTGCACAACCGACGC | GTCTCGTGGGCTCGGA | |
| *HEMK1* | GGGCAGTTGCTCTGTGTTGGTG | GTCTCGTGGGCTCGGA | |
| *DCAF11* | CTTTAAGGAAGTAGGTTGAAGTAGG | GTCTCGTGGGCTCGGA | |
| *TLE3* | GGGTTCTGCTCCTCCTCCTC | GTCTCGTGGGCTCGGA | |
| *C11orf58* | TTTATGGGCATGACTATAACCATTTTTG | GTCTCGTGGGCTCGGA | |
| *SPRYD7* | CTTACATAATATATTTGTTTTGATAGAGATG | GTCTCGTGGGCTCGGA | |
| *SSR3* | TAGAGCCTTTAAAAAACCCAGCAGAATGTAATTC | GTCTCGTGGGCTCGGA | |

**Supplemental Figures**

**FIGURE S1.** (*A*) Western blots of lysates of wild-type (WT), *STAU1*-knockout (C8), or isogenic control (C9) HEK293T cell lines, as in Fig. 1A. Arrows indicate the different STAU2 isoforms expressed in HEK293T cells, where superscript numbers denote their molecular weights in kDa. Calnexin (CANX) served as a loading control. The left-most four lanes show serial 3-fold dilutions of cell lysates and are used for semi-quantitative analyses. Total STAU2 levels were normalized to the levels of CANX, and the normalized level in WT cells is defined as 100.(*B*) Correlation of SBIs between two biological replicates.(*C*) Correlation of SBIs derived from PASS reads and SBIs from unique molecular identifiers (UMIs). UMIs are based on the random nucleotides in the adapter sequence, poly(A) sequence length in the read, and cleavage site, as explained in Zheng et al. RNA 20016. *(D)* Correlation of SBIs (Method 1) with SBIs normalized to input signals (Method 2). Method formulas are shown in the graph.

**FIGURE S2.** (*A*)Mapping statistics of RIPiT and iCLIP-seq reads in different regions of the genome. Genes are defined by RefSeq. RIPiT_wt and RIPiT_mt are wild type and mutant STAU1 data, respectively. (*B*) Correlation of 3ʹREADS+RIP data with STAU1 binding based on RIPiT reads in the 3’UTR (left) or in the full transcript (right). (*C*) As in (*B*) except that iCLIP-seq reads were analyzed. *(D)* As in (*B*) except that iCLIP-seq reads and RIPiT reads were analyzed. (*E*) Correlation between STAU1 binding to 3'UTRs and CDSs using the RIPiT data.

**FIGURE S3.** As in Figure 2B, pie charts showing the percentage of transcripts harboring different types of 3'UTR *Alu*s in different samples.

**FIGURE S4.** (*A*) Heatmap showing distribution of gene based on SBI deciles of the proximal PAS isoform (pPAS, x-axis) and the distal PAS isoform (dPAS, y-axis). Each cell of the 10x10 table contains genes whose proximal PAS isoform (x-axis) and distal PAS isoform (y-axis) fall into the defined deciles. The number of genes in each cell is indicated and its ratio to the average number of genes across all cells is represented by color based on a color scheme shown at the bottom. (*B*) Boxplot of APA isoform relative abundance difference (RED) in *STAU1*-KO HEK293T cells (C8) transiently expressing STAU1-FLAG relative to FLAG-GFP. Genes were divided into three groups based on their isoform-binding characteristics. Blue, grey, and red genes correspond to those in Fig. 4B. P-values (Wilcoxon test) indicating the significance of differences are shown.

**FIGURE S5.** (*A*) Conserved nucleotides between the consensus *Alu* element and the sense (s) or reverse-complement (rc) of the antisense (as) STAU1-binding MEME motifs are indicated by stars (*). Nucleotides that are less or more conserved in the STAU1-binding MEME motifs than in the consensus *Alu* element are labeled, respectively, in red or blue. Nucleotides that are mutated in the STAU1-binding MEME motifs compared to the consensus *Alu* element are labeled in purple. V: A,C or G; H: A, C or T; D: A, G or T, B: C, G or T; M (amino): A or C; R (purine): A or G; W (weak): A or T; S (strong): C or G; Y (pyrimidine): C or T; K (keto): G or T.

(*B*,*C*) Cumulative distribution function curves of the differential binding affinity of STAU1 to APA mRNA isoforms, as measured by using RIPiT (B) or iCLIP (C) data, classified according to their aUTR-bearing IR*Alu*s and/or STAU1-binding MEME motifs. Note that the number of genes in each category could differ between Fig. 5D, Fig. S4B and Fig. S4C because each analysis is limited to the genes for which reads were detected in 3'READS+RIP, RIPiT or iCLIP, respectively. *P*-values (K-S test) indicating significance of the difference between gene sets are shown. *(D)* Schematic describing the strategy using RT-qPCR to measure the relative abundance of short and long 3ʹUTR RNA isoforms. RT is performed using a mix of random hexamers (N6) and a pool of anchored oligos consisting of 5ʹ- universal adapter−oligo(dT)−VN anchor -3', where V is A,G or C, and N is any deoxynucleotide. qPCR of cDNA deriving from short 3ʹUTR isoforms used a forward primer annealing to each cUTR, and a reverse primer annealing to the universal adapter. qPCR of cDNA deriving from long 3ʹUTRs (typically >1kb) will not be efficiently amplified due to short PCR-amplification times. Therefore, the qPCR signal from the long 3ʹUTR isoform derives mainly from the forward and reverse primers that are specific to each aUTR.
